# Supplementary material for: Asylum seeking children and adolescents in Australian immigration detention on Nauru: a longitudinal cohort study
Source: PubMed Central journal article supplement — BMJ Paediatr Open. 2020 Mar 15;4(1):e000615. doi: 10.1136/bmjpo-2019-000615 (PMC7073805; doi:10.1136/bmjpo-2019-000615), 2020-03-15
Supplement: bmjpo-2019-000615.draft_revisions.pdf [file bmjpo-2019-000615.draft_revisions.pdf]

# BMJ Paediatrics Open

BMJ Paediatrics Open is committed to open peer review. As part of this commitment we make the peer review history of every article we publish publicly available.

When an article is published we post the peer reviewers' comments and the authors' responses online. We also post the versions of the paper that were used during peer review. These are the versions that the peer review comments apply to.

The versions of the paper that follow are the versions that were submitted during the peer review process. They are not the versions of record or the final published versions. They should not be cited or distributed as the published version of this manuscript.

BMJ Paediatrics Open is an open access journal and the full, final, typeset and author-corrected version of record of the manuscript is available on our site with no access controls, subscription charges or pay-per-view fees (<http://bmjpaedsopen.bmj.com>).

If you have any questions on BMJ Paediatrics Open's open peer review process please email [info.bmjpo@bmj.com](mailto:info.bmjpo@bmj.com)

# BMJ Paediatrics Open

## Asylum seeking children and adolescents in Australian immigration detention on Nauru: a longitudinal cohort study.

|                               |                                                                                                                                                                                                                                                                                                                                                                                                                                                                                                                                                                                                                                                                                                                                                                                                                                                                                                                                                                                                                                                                                                                                                                                                                                                                                                                                                                                                                                                                                                                                                                                                                                                                                                                                                                                                                                                                                                            |
|-------------------------------|------------------------------------------------------------------------------------------------------------------------------------------------------------------------------------------------------------------------------------------------------------------------------------------------------------------------------------------------------------------------------------------------------------------------------------------------------------------------------------------------------------------------------------------------------------------------------------------------------------------------------------------------------------------------------------------------------------------------------------------------------------------------------------------------------------------------------------------------------------------------------------------------------------------------------------------------------------------------------------------------------------------------------------------------------------------------------------------------------------------------------------------------------------------------------------------------------------------------------------------------------------------------------------------------------------------------------------------------------------------------------------------------------------------------------------------------------------------------------------------------------------------------------------------------------------------------------------------------------------------------------------------------------------------------------------------------------------------------------------------------------------------------------------------------------------------------------------------------------------------------------------------------------------|
| Journal:                      | <i>BMJ Paediatrics Open</i>                                                                                                                                                                                                                                                                                                                                                                                                                                                                                                                                                                                                                                                                                                                                                                                                                                                                                                                                                                                                                                                                                                                                                                                                                                                                                                                                                                                                                                                                                                                                                                                                                                                                                                                                                                                                                                                                                |
| Manuscript ID                 | bmjpo-2019-000615                                                                                                                                                                                                                                                                                                                                                                                                                                                                                                                                                                                                                                                                                                                                                                                                                                                                                                                                                                                                                                                                                                                                                                                                                                                                                                                                                                                                                                                                                                                                                                                                                                                                                                                                                                                                                                                                                          |
| Article Type:                 | Protocol                                                                                                                                                                                                                                                                                                                                                                                                                                                                                                                                                                                                                                                                                                                                                                                                                                                                                                                                                                                                                                                                                                                                                                                                                                                                                                                                                                                                                                                                                                                                                                                                                                                                                                                                                                                                                                                                                                   |
| Date Submitted by the Author: | 26-Nov-2019                                                                                                                                                                                                                                                                                                                                                                                                                                                                                                                                                                                                                                                                                                                                                                                                                                                                                                                                                                                                                                                                                                                                                                                                                                                                                                                                                                                                                                                                                                                                                                                                                                                                                                                                                                                                                                                                                                |
| Complete List of Authors:     | Zwi, Karen; University of New South Wales - Randwick Campus, School of Women's and Children's Health; Sydney Children's Hospitals Network Randwick and Westmead,<br>Sealy, Louise; Sydney Children's Hospitals Network Randwick and Westmead, Community Child Health<br>Samir, Nora; University of New South Wales - Randwick Campus, School of Women's and Children's Health<br>Hu, Nan; University of New South Wales - Randwick Campus, School of Women's and Children's Health<br>Rostami, Reza; University of New South Wales - Randwick Campus, School of Psychiatry<br>Agrawal, Rishi; Women's and Children's Hospital Adelaide Division of Paediatric Medicine, General Paediatrics<br>Cherian, Sarah; Perth Children's Hospital, Paediatrics<br>Coleman, Jacinta; Monash Children's Hospital, Adolescent Medicine<br>Francis, Josh; Royal Darwin Hospital, Paediatric Infectious Diseases<br>Gunasekera, Hasantha; The University of Sydney, School of Paediatrics; Sydney Children's Hospitals Network Randwick and Westmead,<br>Isaacs, David; Sydney Children's Hospitals Network Randwick and Westmead, Paediatric Infectious Diseases<br>Larcombe, Penny; Gold Coast University Hospital, Paediatrics<br>Levitt, David; Children's Health Queensland Hospital and Health Service<br>Mares, Sarah; University of New South Wales - Randwick Campus, School of Psychiatry<br>Mutch, Raewyn; Perth Children's Hospital, Paediatrics<br>Newman, Louise; The Royal Women's Hospital, Child Psychiatry<br>Raman, Shanti; South Western Sydney Local Health District, Department of Community Paediatrics; University of New South Wales, Women's & Children's Health<br>Young, Helen; Royal North Shore Hospital School, Paediatrics<br>Norwood, Christy; Sydney Children's Hospitals Network Randwick, Community Child Health<br>Lingam, Raghu; University of New South Wales - Kensington Campus |
| Keywords:                     | Comm Child Health, Health services research, Neurodevelopment, General Paediatrics                                                                                                                                                                                                                                                                                                                                                                                                                                                                                                                                                                                                                                                                                                                                                                                                                                                                                                                                                                                                                                                                                                                                                                                                                                                                                                                                                                                                                                                                                                                                                                                                                                                                                                                                                                                                                         |
|                               |                                                                                                                                                                                                                                                                                                                                                                                                                                                                                                                                                                                                                                                                                                                                                                                                                                                                                                                                                                                                                                                                                                                                                                                                                                                                                                                                                                                                                                                                                                                                                                                                                                                                                                                                                                                                                                                                                                            |

1  
2  
3  
4  
5  
6  
7  
8  
9  
10  
11  
12  
13  
14  
15  
16  
17  
18  
19  
20  
21  
22  
23  
24  
25  
26  
27  
28  
29  
30  
31  
32  
33  
34  
35  
36  
37  
38  
39  
40  
41  
42  
43  
44  
45  
46  
47  
48  
49  
50  
51  
52  
53  
54  
55  
56  
57  
58  
59  
60

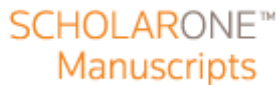

1  
2  
3  
4  
5  
6  
7  
8  
9  
10  
11  
12  
13  
14  
15  
16  
17  
18  
19  
20  
21  
22  
23  
24  
25  
26  
27  
28  
29  
30  
31  
32  
33  
34  
35  
36  
37  
38  
39  
40  
41  
42  
43  
44  
45  
46  
47  
48  
49  
50  
51  
52  
53  
54  
55  
56  
57  
58  
59  
60

# Asylum seeking children and adolescents in Australian immigration detention on Nauru: a longitudinal cohort study.

**Corresponding Author:**

**Karen Zwi**

**Address: Community Child Health Department**

**Sydney Children's Hospital**

**Cnr Barker and Avoca Street**

**Randwick, NSW 2031**

**Australia**

**Email: [karen.zwi@health.nsw.gov.au](mailto:karen.zwi@health.nsw.gov.au)**

**Tel: +9 612 9382 8472**

**Fax: +9 612 9382 8188**

| [\[Type here\]](#)

**Co-authors**

Sealy, Louise; Community Child Health, Sydney Children's Hospitals Network, Sydney, Australia  
Samir, Nora; School of Women's and Children's Health, University of New South Wales, Sydney, Australia  
Hu, Nan; School of Women's and Children's Health, University of New South Wales, Sydney, Australia  
Rostami, Reza; School of Psychiatry, University of New South Wales, Sydney, Australia  
Agrawal, Rishi; General Paediatrics, Women's and Children's Hospital Adelaide, Australia  
Cherian, Sarah; Paediatrics, Perth Children's Hospital, Perth, Australia  
Coleman, Jacinta; Adolescent Medicine, Monash Children's Hospital, Melbourne, Australia  
Francis, Josh; Paediatric Infectious Diseases, Royal Darwin Hospital, Darwin, Australia  
Gunasekera, Hasantha; School of Paediatrics, University of Sydney and Sydney Children's Hospitals Network, Sydney, Australia  
Isaacs, David; Paediatric Infectious Diseases Sydney Children's Hospitals Network, Sydney, Australia  
Larcombe, Penny; Paediatrics, Gold Coast University Hospital, Brisbane, Australia  
Levitt, David; Children's Health Queensland Hospital and Health Service, Brisbane, Australia  
Mares, Sarah; School of Psychiatry, University of New South Wales, Sydney, Australia  
Mutch, Raewyn; Paediatrics, Perth Children's Hospital, Perth, Australia  
Newman, Louise; Child Psychiatry, Royal Women's Hospital, Melbourne, Australia  
Raman, Shanti; Department of Community Paediatrics, South Western Sydney Local Health District and School of Women's and Children's Health, University of New South Wales, Sydney, Australia  
Young, Helen; Paediatrics, Royal North Shore Hospital, Sydney, Australia  
Norwood, Christy; Community Child Health, Sydney Children's Hospitals Network, Sydney, Australia  
Lingam, Raghu; School of Women's and Children's Health, University of New South Wales and Community Child Health, Sydney Children's Hospitals Network, Sydney, Australia

**Key words**

Comm Child Health, Health services research, Neurodevelopment, General Paediatrics

**Word count** – 2498 excluding title page, abstract, references, what is known/this study adds.

[Type here]

## **Abstract**

**Introduction:** Immigration detention has a profound and negative impact on the physical health, mental health, development and social-emotional wellbeing of children, adolescents and their family. Australian clinicians will report results from detailed health and wellbeing assessments of asylum seeking children and adolescents who have experienced prolonged immigration detention.

**Methods and analysis:** This is a national, multicentre study with a longitudinal cohort design that will document health and wellbeing outcomes of the children and adolescents who have been detained in offshore detention on the remote island of Nauru. Outcome measures will be reported from the time arrival in Australia and repeated over a five year follow-up period. Measures include demographics, residency and detention history, other social risk and protective factors for health and wellbeing (e.g. adverse childhood experiences), physical health and wellbeing outcomes (including mental health, development and social-emotional wellbeing) and clinical service utilisation. Longitudinal follow-up will include a combination of retrospective and prospective data collection to capture outcomes over a 5 year period after arrival in Australia. Analysis will be undertaken to explore baseline factors, with regression analyses to assess their impact on health and wellbeing outcomes. To understand how children's outcomes change over time, multi-level regression analysis will be utilised. Structural equation modelling will be conducted to explore the correlation between baseline factors, mediational factors, and outcomes to assess trajectories over time.

**Ethics and dissemination.** This research project was approved by the Sydney Children's Hospitals Network Human Research Ethics Committee. Subsequent site-specific approvals were sought from governing bodies where the clinical consultations took place. In order to ensure this research is relevant and sensitive to the needs of the cohort, our research team includes an asylum seeker who has spent time in Australian immigration detention. Results will be presented at conferences and published in peer-reviewed Medline-indexed journals.

[Type here]

### **What is known about the subject**

1. The number of forcibly displaced people worldwide is the highest on record and over half of these are children and adolescents.
2. The health and wellbeing of asylum seeking children and adolescents is a major global public health concern.
3. Immigration detention is known to have a negative impact on children and adolescents' mental health, physical health, development, social and emotional wellbeing.

### **What this article adds**

1. This protocol describes the methods to undertake a longitudinal cohort study of children and adolescents who have been detained in immigration detention.
2. We will document the immediate and long term physical health, mental health, development and social-emotional wellbeing of children and adolescents who have experienced prolonged detention.
3. Understanding the immediate and longer-term impact of detention may allow us to mitigate harm by informing policy nationally and internationally.

## **Introduction**

There are an estimated 70.9 million forcibly displaced people worldwide, the highest level on record; over half of these are children and adolescents (1). Displaced children, adolescents and adults face multiple physical and mental challenges pre-migration, in transit and continuing hardships post-migration (2, 3). Many countries detain asylum seekers while they process their asylum application. International literature exists pertaining to the profound negative impact of detention on physical health, mental health and wellbeing in children, adolescents and adults (3-10). The severity of mental distress increases with the amount of time spent in detention. Common psychiatric diagnoses in children include depression, anxiety, post-traumatic stress disorder (PTSD) and somatisation in addition to described emotional, behavioural and developmental difficulties (4).

Australia has a formal refugee intake program, accepting between 12,000 – 20,000 refugees under the Humanitarian Entrants Program after their claims are processed by the United Nations High Commissioner for Refugees (UNHCR) overseas. This program supports refugees with housing, case management, English language lessons, public school enrolment, social security payments and access to the universal healthcare system, including reduced price pharmaceutical benefits, consistent with other Australian citizens and permanent residents (11). In contrast, Australia has a punitive policy of deterrence for people applying for refugee status once in Australia, or ‘asylum seekers’, particularly those arriving by boat. Australia’s immigration detention policies are one of the most punitive in the world and they violate human rights obligations under the International Covenant on Civil and Political Rights and the Convention on the Rights of the Child (10). Since 1992 all asylum seekers have been subjected to mandatory detention and, from 2013, all boat arrivals have been processed offshore on remote islands such as Nauru (adults and children) and Manus Island (only adults). All children and their families were released from offshore detention on Nauru by early 2019, by which time many had been living in harsh physical and psychological conditions for more than 5 years (5). The detention is unprecedented and the duration prolonged. The extent of the negative effects on physical and mental health for the immediate and longer term is unknown.

A longitudinal study of these children and adolescents will enable tracking of their physical health, mental health, development and social-emotional wellbeing over time. Importantly, this objective and structured follow up may also assist in early identification of those in need of intervention. There are many practical and political challenges to working with this cohort of children, but Australia is unfortunately in a unique position to document in detail the physical health and wellbeing of asylum seeking children who have in immigration detention for prolonged periods. Paediatricians and child psychiatrists across Australia who specialise in refugee health are part of an organised network, known as the ‘Australian Refugee Child Health Network (ARCH)’, and provide evidence-based care to the majority of children that were detained on Nauru. This expert care was delivered as telehealth consultations prior to transfer, comprehensive medical assessments on arrival and ongoing clinical reviews.

It is estimated that around 200 children detained on Nauru between 2013 and 2019 and many clinicians who performed their medical assessments have agreed to be co-investigators on this study. Understanding the immediate and longer-term impact of detention may allow us to mitigate harm through sharing this knowledge with international colleagues providing

[Type here]



1  
2  
3 health care to children and adolescents who have been detained, as well as inform policy  
4 nationally and internationally.  
5

## 6 **Methods and analysis**

### 7 **Design**

8  
9  
10 This is a longitudinal study of children and adolescents who were detained in Australian  
11 offshore detention. We will combine retrospective and prospective methods to describe their  
12 physical health, mental health, development, social and emotional wellbeing at baseline (prior  
13 to transfer or on arrival in Australia) and over a 5 year follow up period after transfer to  
14 Australia. Retrospective data will be extracted from existing medical records, and  
15 prospective follow up will involve providing data from annual consultations for a period of 5  
16 years post-arrival in Australia. Follow up will incorporate standardised assessments of social  
17 and emotional wellbeing using the Strengths and Difficulties Questionnaire (SDQ). These  
18 data will be collected using a Research Electronic Data Capture (REDCap) survey completed  
19 by the patient's clinician.  
20  
21  
22  
23  
24

### 25 **Participants**

26 Children and adolescents (younger than 18 years at the time of initial immigration detention)  
27 who were in immigration detention or offshore processing on Nauru and received a clinical  
28 consultation prior to, or on arrival in Australia, will be eligible for this study. Approximately  
29 200 children were transferred from Nauru between 2013 and 2019. The clinician  
30 investigators from the Australian Refugee Child Health Network will identify eligible  
31 participants and invite them and/or their legal parent/guardian to participate.  
32  
33  
34

### 35 **Measures**

36  
37 Measures that will be collected are demographics (including residency history and visa  
38 status), psychosocial risk and protective factors, physical health and clinical characteristics.  
39 The key outcome measure of interest is wellbeing, including mental health, development and  
40 social-emotional wellbeing. Baseline data collection will include all measures, whereas  
41 annual follow up data will not include measures that do not change over time. For prospective  
42 follow up data, clinicians will be asked to use standardised questions for the assessment of  
43 their patient's mental health (such as the Child Stress Disorders Checklist for PTSD), and  
44 standardised tools for social-emotional wellbeing (the Strengths and Difficulties  
45 Questionnaire).  
46  
47  
48

#### 49 **1. Demographics**

50 Demographic details include the child's date of birth, gender, place of birth, ethnic  
51 background, country of origin, country of transit, primary language spoken, date of arrival in  
52 Australia, and family composition. Residency history and visa details include the initial date  
53 of detention, total time in detention, the number of times and places of detention and current  
54 visa type.  
55  
56

#### 57 **2. Psychosocial risk and protective factors**

58  
59  
60  
| [\[Type here\]](#)

1  
2  
3 These include known or suspected risk and protective settlement factors, categorised into  
4 child, family and settlement factors. This information is often collected as part of routine  
5 medical consultations for refugee children. It includes Refugee specific Adverse Childhood  
6 Experiences such as prolonged transit and witnessing trauma (R-ACE) (12), as well as the  
7 standard Adverse Childhood Experience (ACE) measures, such as psychological, physical  
8 and sexual abuse and household dysfunction (substance abuse, mental illness, mother treated  
9 violently and criminal behaviour in the household) (13). Scoring for the ACE is based on the  
10 sum of childhood abuse and household dysfunction categories, with a score of 0 indicating no  
11 exposure, and a score of 7 indicating exposure to all categories (13).  
12  
13

### 14 15 **3. Physical health and clinical characteristics**

16  
17 This includes diagnoses coded according to the Australian Modification of the International  
18 Statistical Classification of Diseases and Related Health Problems (ICD-10-AM), an  
19 expanded version of the World Health Organization (WHO) ICD-10. Additional physical  
20 health measures include height, weight, body mass index, immunisation status, oral health,  
21 medication and other treatments. Clinical characteristics include who performed the health  
22 assessments, their frequency and location, and length of stay if inpatient admission was  
23 required.  
24  
25

### 26 27 **4. Outcome measure: Wellbeing**

28 Wellbeing outcomes are categorised into medical and mental health diagnoses,  
29 developmental difficulties or disabilities, and social-emotional wellbeing.  
30

31  
32 Formal mental health diagnoses will be categorised by ICD-10-AM codes. In order to capture  
33 sub-diagnostic symptoms, as not all mental health symptoms experienced by children and  
34 adolescents reach the threshold for a DSM V diagnosis, mental health symptoms will be  
35 dichotomously coded as 'yes' or 'no'. This includes Pervasive Refusal Syndrome (PRS)  
36 symptoms (14) and Post Traumatic Stress Disorder (PTSD) symptoms (15).  
37

38  
39 Developmental difficulties or disabilities will be categorised by age (pre-school and school  
40 aged children/adolescents). Clinicians will report on any developmental delay, regression,  
41 learning difficulties, Attention Deficit Hyperactivity Disorder (ADHD), Autism Spectrum  
42 Disorder (ASD) and others. If neither screening nor formal assessment was undertaken,  
43 clinicians will provide a clinical impression of their patient's neurodevelopmental status.  
44

45  
46 The Strengths and Difficulties Questionnaire (SDQ) will be used to measure social-emotional  
47 wellbeing. The SDQ includes 25 items, with five symptom subscales assessing emotional  
48 symptoms, conduct problems, hyperactivity and inattention, peer relations, and prosocial  
49 behaviour (16, 17).  
50

### 51 52 **Data collection and storage**

53 All data will be collected electronically, using Research Electronic Data Capture (REDCap)  
54 survey tool, managed by the study team in Sydney. REDCap is a secure web-based  
55 application used to support data collection for research studies (18).  
56

57  
58 Clinicians will receive an email from the research team containing the unique study  
59 identification numbers for their patients only, and an online link to a REDCap survey for  
60

61  
62  
63  
64  
65  
66  
67  
68  
69  
70  
71  
72  
73  
74  
75  
76  
77  
78  
79  
80  
81  
82  
83  
84  
85  
86  
87  
88  
89  
90  
91  
92  
93  
94  
95  
96  
97  
98  
99  
100  
101  
102  
103  
104  
105  
106  
107  
108  
109  
110  
111  
112  
113  
114  
115  
116  
117  
118  
119  
120  
121  
122  
123  
124  
125  
126  
127  
128  
129  
130  
131  
132  
133  
134  
135  
136  
137  
138  
139  
140  
141  
142  
143  
144  
145  
146  
147  
148  
149  
150  
151  
152  
153  
154  
155  
156  
157  
158  
159  
160  
161  
162  
163  
164  
165  
166  
167  
168  
169  
170  
171  
172  
173  
174  
175  
176  
177  
178  
179  
180  
181  
182  
183  
184  
185  
186  
187  
188  
189  
190  
191  
192  
193  
194  
195  
196  
197  
198  
199  
200  
201  
202  
203  
204  
205  
206  
207  
208  
209  
210  
211  
212  
213  
214  
215  
216  
217  
218  
219  
220  
221  
222  
223  
224  
225  
226  
227  
228  
229  
230  
231  
232  
233  
234  
235  
236  
237  
238  
239  
240  
241  
242  
243  
244  
245  
246  
247  
248  
249  
250  
251  
252  
253  
254  
255  
256  
257  
258  
259  
260  
261  
262  
263  
264  
265  
266  
267  
268  
269  
270  
271  
272  
273  
274  
275  
276  
277  
278  
279  
280  
281  
282  
283  
284  
285  
286  
287  
288  
289  
290  
291  
292  
293  
294  
295  
296  
297  
298  
299  
300  
301  
302  
303  
304  
305  
306  
307  
308  
309  
310  
311  
312  
313  
314  
315  
316  
317  
318  
319  
320  
321  
322  
323  
324  
325  
326  
327  
328  
329  
330  
331  
332  
333  
334  
335  
336  
337  
338  
339  
340  
341  
342  
343  
344  
345  
346  
347  
348  
349  
350  
351  
352  
353  
354  
355  
356  
357  
358  
359  
360  
361  
362  
363  
364  
365  
366  
367  
368  
369  
370  
371  
372  
373  
374  
375  
376  
377  
378  
379  
380  
381  
382  
383  
384  
385  
386  
387  
388  
389  
390  
391  
392  
393  
394  
395  
396  
397  
398  
399  
400  
401  
402  
403  
404  
405  
406  
407  
408  
409  
410  
411  
412  
413  
414  
415  
416  
417  
418  
419  
420  
421  
422  
423  
424  
425  
426  
427  
428  
429  
430  
431  
432  
433  
434  
435  
436  
437  
438  
439  
440  
441  
442  
443  
444  
445  
446  
447  
448  
449  
450  
451  
452  
453  
454  
455  
456  
457  
458  
459  
460  
461  
462  
463  
464  
465  
466  
467  
468  
469  
470  
471  
472  
473  
474  
475  
476  
477  
478  
479  
480  
481  
482  
483  
484  
485  
486  
487  
488  
489  
490  
491  
492  
493  
494  
495  
496  
497  
498  
499  
500  
501  
502  
503  
504  
505  
506  
507  
508  
509  
510  
511  
512  
513  
514  
515  
516  
517  
518  
519  
520  
521  
522  
523  
524  
525  
526  
527  
528  
529  
530  
531  
532  
533  
534  
535  
536  
537  
538  
539  
540  
541  
542  
543  
544  
545  
546  
547  
548  
549  
550  
551  
552  
553  
554  
555  
556  
557  
558  
559  
560  
561  
562  
563  
564  
565  
566  
567  
568  
569  
570  
571  
572  
573  
574  
575  
576  
577  
578  
579  
580  
581  
582  
583  
584  
585  
586  
587  
588  
589  
590  
591  
592  
593  
594  
595  
596  
597  
598  
599  
600  
601  
602  
603  
604  
605  
606  
607  
608  
609  
610  
611  
612  
613  
614  
615  
616  
617  
618  
619  
620  
621  
622  
623  
624  
625  
626  
627  
628  
629  
630  
631  
632  
633  
634  
635  
636  
637  
638  
639  
640  
641  
642  
643  
644  
645  
646  
647  
648  
649  
650  
651  
652  
653  
654  
655  
656  
657  
658  
659  
660  
661  
662  
663  
664  
665  
666  
667  
668  
669  
670  
671  
672  
673  
674  
675  
676  
677  
678  
679  
680  
681  
682  
683  
684  
685  
686  
687  
688  
689  
690  
691  
692  
693  
694  
695  
696  
697  
698  
699  
700  
701  
702  
703  
704  
705  
706  
707  
708  
709  
710  
711  
712  
713  
714  
715  
716  
717  
718  
719  
720  
721  
722  
723  
724  
725  
726  
727  
728  
729  
730  
731  
732  
733  
734  
735  
736  
737  
738  
739  
740  
741  
742  
743  
744  
745  
746  
747  
748  
749  
750  
751  
752  
753  
754  
755  
756  
757  
758  
759  
760  
761  
762  
763  
764  
765  
766  
767  
768  
769  
770  
771  
772  
773  
774  
775  
776  
777  
778  
779  
780  
781  
782  
783  
784  
785  
786  
787  
788  
789  
790  
791  
792  
793  
794  
795  
796  
797  
798  
799  
800  
801  
802  
803  
804  
805  
806  
807  
808  
809  
810  
811  
812  
813  
814  
815  
816  
817  
818  
819  
820  
821  
822  
823  
824  
825  
826  
827  
828  
829  
830  
831  
832  
833  
834  
835  
836  
837  
838  
839  
840  
841  
842  
843  
844  
845  
846  
847  
848  
849  
850  
851  
852  
853  
854  
855  
856  
857  
858  
859  
860  
861  
862  
863  
864  
865  
866  
867  
868  
869  
870  
871  
872  
873  
874  
875  
876  
877  
878  
879  
880  
881  
882  
883  
884  
885  
886  
887  
888  
889  
890  
891  
892  
893  
894  
895  
896  
897  
898  
899  
900  
901  
902  
903  
904  
905  
906  
907  
908  
909  
910  
911  
912  
913  
914  
915  
916  
917  
918  
919  
920  
921  
922  
923  
924  
925  
926  
927  
928  
929  
930  
931  
932  
933  
934  
935  
936  
937  
938  
939  
940  
941  
942  
943  
944  
945  
946  
947  
948  
949  
950  
951  
952  
953  
954  
955  
956  
957  
958  
959  
960  
961  
962  
963  
964  
965  
966  
967  
968  
969  
970  
971  
972  
973  
974  
975  
976  
977  
978  
979  
980  
981  
982  
983  
984  
985  
986  
987  
988  
989  
990  
991  
992  
993  
994  
995  
996  
997  
998  
999  
1000

entering data. Clinicians will then enter data from the patient's medical records that will then be sent to the research team for analysis.

### Data analyses

Data will be analysed in a de-identified format. Data analyses will demonstrate the proportion of participants who were diagnosed with a range of medical, mental health, developmental or social-emotional wellbeing conditions. Length of stay and other parameters of admission will be analysed and presented. Follow-up data will include community or held residential detention, relocated or lost to follow-up. Outcomes of interest will include social-emotional wellbeing as measured using the SDQ, Pervasive Refusal Syndrome symptoms at baseline and mental health disorders.

Descriptive analyses will be undertaken to summarise means, variances, and distributions of baseline factors. Regression analysis will be conducted to examine how baseline factors influence children's outcomes assessed at follow-up periods. To understand how children's outcomes change over time, multi-level regression analysis (e.g. latent growth curve analysis) will be utilised to quantify the pattern of change in these outcomes. We will examine how baseline factors and factors that vary with time shape children's outcome trajectories. Non-parametric measures as appropriate and structural equation modelling will be conducted to explore the inter-correlation between baseline factors, mediational factors, and outcomes (e.g. mental health problems) to assess trajectories over time.

### Data storage

Participant identification numbers and contact details will be stored electronically in a password-protected excel spreadsheet in a secure location on UNSW OneDrive, accessible only to the study team named on the protocol. No clinically sensitive data will be stored with this file, which will be stored separately from any data analysis files. All data collected for analysis will be de-identified using the participant's unique identification number. Critical REDCap security components involve user authentication and role-based security. More specifically, the 'User Rights' tool ensures that all survey data entered are confidential and secured with restricted access to certain data from research personnel. Survey forms are also only accessible to users that have been granted survey access privileges.

### Patient and Public Involvement Statement

One of our core research study team (RR) has lived experience of detention as an asylum seeker in Australia, and in this way is similar to our patient cohort. He was involved in the study from the beginning, providing advice on key aspects of the study design, including the definition of the research questions, choice of the outcome measures and selection of relevant questions for the questionnaire. He will be involved in write-up and public dissemination of any research outputs.

Although we as authors support active involvement of patients as co-producers of research, we did not involve patients in this particular study. We considered patient involvement as inappropriate given that our patients are children and adolescents who have experienced prolonged detention in Australia's offshore processing system and whose immigration status remains uncertain. This project involves the collection of their data from their treating teams

[Type here]

1  
2  
3 and does not seek to add to their stressors by requesting anything additional from them apart  
4 from their/parental consent and attending follow up annually.  
5

### 6 7 **Participant consent and withdrawal**

8 In order to maintain participant confidentiality and privacy, eligible participants and their  
9 parent/legal guardian will be invited to participate in the study by their usual clinician, with a  
10 qualified health care interpreter as necessary. This will occur at the next scheduled  
11 consultation or, where no consultation is scheduled within two months, clinicians will  
12 telephone participants and invite them to a consultation for discussion about the study.  
13 During this consultation, clinicians will explain what participation will involve, that  
14 participation is voluntary, encourage eligible participants to ask any questions they may have  
15 and facilitate provision of consent to participate if they are interested. Consent will be  
16 sought from both the child/adolescent participant and parent/legal guardian where the  
17 clinician deems the child/adolescent able to give informed consent, or from the parent/legal  
18 guardian only when the participant is not deemed competent and mature to give informed  
19 consent.  
20  
21

22  
23 Clinicians will present the two participation options below to children/adolescents and  
24 parents/guardians:  
25

26  
27 **Participation Option 1. Retrospective follow-up:** Participants consent to clinicians  
28 providing data from previous clinical consultations that took place from around the time of  
29 transfer to Australia, and up to the date of consent to this study. As this participation option  
30 involves already collected data, no additional time commitments are required from  
31 participants.  
32

33 **Participation Option 2. Retrospective and prospective follow-up:** Participation will  
34 involve Option 1 above (retrospective follow-up) PLUS consent to clinicians providing data  
35 from medical records of new routine clinical consultations for the next five years. If no  
36 routine consultations are clinically required, then participants will be invited by their refugee  
37 health clinician to attend an annual physical health and wellbeing assessment that will take  
38 approximately one hour.  
39

40  
41 Where participants have relocated and are uncontactable, a waiver of consent to Participation  
42 Option 1 (de-identified retrospective follow-up) has been approved by the Ethics Committee  
43 in acknowledgment of the public interest imperative to understand the impact of prolonged  
44 detention on Nauru in children and adolescents.  
45

### 46 47 **Participant withdrawal and loss to follow up**

48  
49 If a participant or their parent/legal guardian wishes to withdraw from the study, data will be  
50 withdrawn from the full dataset to meet the individual's wishes and in compliance with  
51 individual circumstances. All major issues arising from this study will be reported to the  
52 SCHN ethics committee and compiled in a final study report with reasons for the issue  
53 arising, including participant withdrawal and revocation of consent. The proportion of  
54 participant withdrawals and loss to follow-up will be recorded and reported and is of  
55 particular interest given the underlying health and wellbeing vulnerabilities of this cohort.  
56  
57  
58  
59  
60

| [\[Type here\]](#)

### **Ethics and dissemination**

Ethical approval has been granted for this research study by the Sydney Children's Hospitals Network Human Research Ethics Committee (HREC reference 2019/ETH11723). Together with the Site Specific Approvals (SSA), this covers all participating sites where eligible study children and adolescents have had or will have health assessments.

In order to ensure the conceptualisation, methodology, interpretation and dissemination of this research is relevant and sensitive to the needs of this cohort, our core research team includes an asylum seeker (RR) who has spent time in Australian immigration detention.

### **Funding:**

This is an unfunded study and investigators have agreed to contribute their time in kind.

### **Competing interests:** nil

### **Author contributions**

Conceptualisation: KZ, LS, NS, NH, RR, RL (core study team)

Methodology, drafting, revisions and final approval: KZ, LS, NS, NH, RL, RA, JC, SC, JF, HG, DI, DL, PL, RM, SM, CN, LN, SR, HY

### **Acknowledgements**

We would like to acknowledge all our other colleagues who are co-investigators for this study and will be involved in the assessments and data entry; Dr Jennifer Anderson, Dr Phillip Britton, Dr Llewella Butland, Dr Gemma Hanes, Dr Jon Jureidini, Alanna Maycock, Dr Merran Mackenzie, Dr Ashfaque Quadir, Dr Veena Raghupathy, Dr Scott Sypek, Andrea Worth

## REFERENCES

1. UNHCR (2019) United Nations Refugee Agency. Figures at a glance. Available from <http://www.unhcr.org/figures-at-a-glance.html>. Accessed October 2019.
2. Porter M, Haslam N. Pre-displacement and post-displacement factors associated with mental health of refugees and internally displaced persons: a meta-analysis. *JAMA*. 2005;294(5):602-12.
3. Lorek A, Ehntholt K, Nesbitt A, Wey E, Githinji C, Rossor E, et al. The mental and physical health difficulties of children held within a British immigration detention center: a pilot study. *Child Abuse Negl*. 2009;33(9):573-85.
4. Von Werthern M, Robjant K, Chui Z, Schon R, Ottisova L, Mason C, et al. The impact of immigration detention on mental health: a systematic review. *BMC Psychiatry*. 2018;18(1):382.
5. Mares S. Fifteen years of detaining children who seek asylum in Australia - evidence and consequences. *Australas Psychiatry*. 2016;24(1):11-4.
6. Zwi K, Mares S, Nathanson D, Tay AK, Silove D. The impact of detention on the social-emotional wellbeing of children seeking asylum: a comparison with community-based children. *European Child & Adolescent Psychiatry*. 2017;27(4):411-22.
7. Fazel M, Karunakara U, Newnham E. Detention, denial and death: migration hazards for refugee children. *Lancet Glob Health*. 2014;2(6):e313-e4.
8. Dudley M, Steel Z, Mares S, Newman L. Children and young people in immigration detention. *Curr Opin Psychiatry*. 2012;25(4):285-92.
9. Robjant K, Hassan R, Katona C. Mental health implications of detaining asylum seekers: systematic review. *Br J Psychiatry*. 2009;194(4):306-12.
10. AHRC (2014) Australian Human Rights Commission. The Forgotten Children: National Inquiry into Children in Immigration Detention. AHRC, 2014.
11. DIAC (2019) Department of Immigration and Citizenship. Refugee and Humanitarian program. Available from <http://immi.homeaffairs.gov.au/what-we/do/refugee-and-humanitarian-program/refugee-visas>. Accessed November 2019.
12. Hanes G, Sung L, Mutch R, Cherian S. Adversity and resilience amongst resettling Western Australian paediatric refugees. *J Paediatr Child Health*. 2017;53(9):882-8.
13. Felitti VJ, Anda RF, Nordenberg D, Williamson DF, Spitz AM, Edwards V, et al. Relationship of Childhood Abuse and Household Dysfunction to Many of the Leading Causes of Death in Adults. *American Journal of Preventive Medicine*. 1998;14(4):245-58.
14. Nunn K, Lask B, Owen I. Pervasive Refusal Syndrome 21 years on 2013. 2014;23:163-72.
15. Bosquet Enlow M, Kassam-Adams N, Saxe G. The Child Stress Disorders Checklist-Short Form: a four-item scale of traumatic stress symptoms in children. *Gen Hosp Psychiatry*. 2010;32(3):321-7.
16. Goodman R, Meltzer H, Bailey V. The Strengths and Difficulties Questionnaire: A pilot study on the validity of the self-report version. *International Review of Psychiatry*. 2003;15(1-2):173-7.
17. Goodman R. The Strengths and Difficulties Questionnaire: A Research Note. *Journal of Child Psychology and Psychiatry*. 1997;38(5):581-6.
18. Harris PA, Taylor R, Thielke R, Payne J, Gonzalez N, Conde JG. Research electronic data capture (REDCap)—A metadata-driven methodology and workflow process for providing translational research informatics support. *Journal of Biomedical Informatics*. 2009;42(2):377-81.



# BMJ Paediatrics Open

## Asylum seeking children and adolescents in Australian immigration detention on Nauru: a longitudinal cohort study.

|                               |                                                                                                                                                                                                                                                                                                                                                                                                                                                                                                                                                                                                                                                                                                                                                                                                                                                                                                                                                                                                                                                                                                                                                                                                                                                                                                                                                                                                                                                                                                                                                                                                                                                                                                                                                                                                                                                                                                            |
|-------------------------------|------------------------------------------------------------------------------------------------------------------------------------------------------------------------------------------------------------------------------------------------------------------------------------------------------------------------------------------------------------------------------------------------------------------------------------------------------------------------------------------------------------------------------------------------------------------------------------------------------------------------------------------------------------------------------------------------------------------------------------------------------------------------------------------------------------------------------------------------------------------------------------------------------------------------------------------------------------------------------------------------------------------------------------------------------------------------------------------------------------------------------------------------------------------------------------------------------------------------------------------------------------------------------------------------------------------------------------------------------------------------------------------------------------------------------------------------------------------------------------------------------------------------------------------------------------------------------------------------------------------------------------------------------------------------------------------------------------------------------------------------------------------------------------------------------------------------------------------------------------------------------------------------------------|
| Journal:                      | <i>BMJ Paediatrics Open</i>                                                                                                                                                                                                                                                                                                                                                                                                                                                                                                                                                                                                                                                                                                                                                                                                                                                                                                                                                                                                                                                                                                                                                                                                                                                                                                                                                                                                                                                                                                                                                                                                                                                                                                                                                                                                                                                                                |
| Manuscript ID                 | bmjpo-2019-000615.R1                                                                                                                                                                                                                                                                                                                                                                                                                                                                                                                                                                                                                                                                                                                                                                                                                                                                                                                                                                                                                                                                                                                                                                                                                                                                                                                                                                                                                                                                                                                                                                                                                                                                                                                                                                                                                                                                                       |
| Article Type:                 | Protocol                                                                                                                                                                                                                                                                                                                                                                                                                                                                                                                                                                                                                                                                                                                                                                                                                                                                                                                                                                                                                                                                                                                                                                                                                                                                                                                                                                                                                                                                                                                                                                                                                                                                                                                                                                                                                                                                                                   |
| Date Submitted by the Author: | 12-Feb-2020                                                                                                                                                                                                                                                                                                                                                                                                                                                                                                                                                                                                                                                                                                                                                                                                                                                                                                                                                                                                                                                                                                                                                                                                                                                                                                                                                                                                                                                                                                                                                                                                                                                                                                                                                                                                                                                                                                |
| Complete List of Authors:     | Zwi, Karen; University of New South Wales - Randwick Campus, School of Women's and Children's Health; Sydney Children's Hospitals Network Randwick and Westmead,<br>Sealy, Louise; Sydney Children's Hospitals Network Randwick and Westmead, Community Child Health<br>Samir, Nora; University of New South Wales - Randwick Campus, School of Women's and Children's Health<br>Hu, Nan; University of New South Wales - Randwick Campus, School of Women's and Children's Health<br>Rostami, Reza; University of New South Wales - Randwick Campus, School of Psychiatry<br>Agrawal, Rishi; Women's and Children's Hospital Adelaide Division of Paediatric Medicine, General Paediatrics<br>Cherian, Sarah; Perth Children's Hospital, Paediatrics<br>Coleman, Jacinta; Monash Children's Hospital, Adolescent Medicine<br>Francis, Josh; Royal Darwin Hospital, Paediatric Infectious Diseases<br>Gunasekera, Hasantha; The University of Sydney, School of Paediatrics; Sydney Children's Hospitals Network Randwick and Westmead,<br>Isaacs, David; Sydney Children's Hospitals Network Randwick and Westmead, Paediatric Infectious Diseases<br>Larcombe, Penny; Gold Coast University Hospital, Paediatrics<br>Levitt, David; Children's Health Queensland Hospital and Health Service<br>Mares, Sarah; University of New South Wales - Randwick Campus, School of Psychiatry<br>Mutch, Raewyn; Perth Children's Hospital, Paediatrics<br>Newman, Louise; The Royal Women's Hospital, Child Psychiatry<br>Raman, Shanti; South Western Sydney Local Health District, Department of Community Paediatrics; University of New South Wales, Women's & Children's Health<br>Young, Helen; Royal North Shore Hospital School, Paediatrics<br>Norwood, Christy; Sydney Children's Hospitals Network Randwick, Community Child Health<br>Lingam, Raghu; University of New South Wales - Kensington Campus |
| Keywords:                     | Comm Child Health, Health services research, Neurodevelopment, General Paediatrics                                                                                                                                                                                                                                                                                                                                                                                                                                                                                                                                                                                                                                                                                                                                                                                                                                                                                                                                                                                                                                                                                                                                                                                                                                                                                                                                                                                                                                                                                                                                                                                                                                                                                                                                                                                                                         |
|                               |                                                                                                                                                                                                                                                                                                                                                                                                                                                                                                                                                                                                                                                                                                                                                                                                                                                                                                                                                                                                                                                                                                                                                                                                                                                                                                                                                                                                                                                                                                                                                                                                                                                                                                                                                                                                                                                                                                            |

1  
2  
3  
4  
5  
6  
7  
8  
9  
10  
11  
12  
13  
14  
15  
16  
17  
18  
19  
20  
21  
22  
23  
24  
25  
26  
27  
28  
29  
30  
31  
32  
33  
34  
35  
36  
37  
38  
39  
40  
41  
42  
43  
44  
45  
46  
47  
48  
49  
50  
51  
52  
53  
54  
55  
56  
57  
58  
59  
60

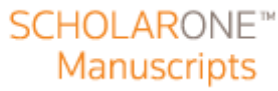



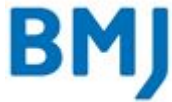

I, the Submitting Author has the right to grant and does grant on behalf of all authors of the Work (as defined in the below author licence), an exclusive licence and/or a non-exclusive licence for contributions from authors who are: i) UK Crown employees; ii) where BMJ has agreed a CC-BY licence shall apply, and/or iii) in accordance with the terms applicable for US Federal Government officers or employees acting as part of their official duties; on a worldwide, perpetual, irrevocable, royalty-free basis to BMJ Publishing Group Ltd ("BMJ") its licensees and where the relevant Journal is co-owned by BMJ to the co-owners of the Journal, to publish the Work in this journal and any other BMJ products and to exploit all rights, as set out in our [licence](#).

The Submitting Author accepts and understands that any supply made under these terms is made by BMJ to the Submitting Author unless you are acting as an employee on behalf of your employer or a postgraduate student of an affiliated institution which is paying any applicable article publishing charge ("APC") for Open Access articles. Where the Submitting Author wishes to make the Work available on an Open Access basis (and intends to pay the relevant APC), the terms of reuse of such Open Access shall be governed by a Creative Commons licence – details of these licences and which [Creative Commons](#) licence will apply to this Work are set out in our licence referred to above.

Other than as permitted in any relevant BMJ Author's Self Archiving Policies, I confirm this Work has not been accepted for publication elsewhere, is not being considered for publication elsewhere and does not duplicate material already published. I confirm all authors consent to publication of this Work and authorise the granting of this licence.

1  
2  
3  
4  
5  
6  
7  
8  
9  
10  
11  
12  
13  
14  
15  
16  
17  
18  
19  
20  
21  
22  
23  
24  
25  
26  
27  
28  
29  
30  
31  
32  
33  
34  
35  
36  
37

# Asylum seeking children and adolescents in Australian immigration detention on Nauru: a longitudinal cohort study.

38  
39

**Corresponding Author:**

40  
41

**Karen Zwi**

42  
43

**Address: Community Child Health Department**

44  
45

**Sydney Children's Hospital**

46  
47

**Cnr Barker and Avoca Street**

48  
49

**Randwick, NSW 2031**

50

**Australia**

51  
52

**Email: [karen.zwi@health.nsw.gov.au](mailto:karen.zwi@health.nsw.gov.au)**

53  
54

**Tel: +9 612 9382 8472**

55  
56  
57  
58  
59  
60

**Fax: +9 612 9382 8188**

**Co-authors**

Sealy, Louise; Community Child Health, Sydney Children's Hospitals Network, Sydney, Australia  
Samir, Nora; School of Women's and Children's Health, University of New South Wales, Sydney, Australia  
Hu, Nan; School of Women's and Children's Health, University of New South Wales, Sydney, Australia  
Rostami, Reza; School of Psychiatry, University of New South Wales, Sydney, Australia  
Agrawal, Rishi; General Paediatrics, Women's and Children's Hospital Adelaide, Australia  
Cherian, Sarah; Paediatrics, Perth Children's Hospital, Perth, Australia  
Coleman, Jacinta; Adolescent Medicine, Monash Children's Hospital, Melbourne, Australia  
Francis, Josh; Paediatric Infectious Diseases, Royal Darwin Hospital, Darwin, Australia  
Gunasekera, Hasantha; School of Paediatrics, University of Sydney and Sydney Children's Hospitals Network, Sydney, Australia  
Isaacs, David; Paediatric Infectious Diseases Sydney Children's Hospitals Network, Sydney, Australia  
Larcombe, Penny; Paediatrics, Gold Coast University Hospital, Brisbane, Australia  
Levitt, David; Children's Health Queensland Hospital and Health Service, Brisbane, Australia  
Mares, Sarah; School of Psychiatry, University of New South Wales, Sydney, Australia  
Mutch, Raewyn; Paediatrics, Perth Children's Hospital, Perth, Australia  
Newman, Louise; Child Psychiatry, Royal Women's Hospital, Melbourne, Australia  
Raman, Shanti; Department of Community Paediatrics, South Western Sydney Local Health District and School of Women's and Children's Health, University of New South Wales, Sydney, Australia  
Young, Helen; Paediatrics, Royal North Shore Hospital, Sydney, Australia  
Norwood, Christy; Community Child Health, Sydney Children's Hospitals Network, Sydney, Australia  
Lingam, Raghu; School of Women's and Children's Health, University of New South Wales and Community Child Health, Sydney Children's Hospitals Network, Sydney, Australia

**Key words**

Community Child Health, Health services research, Neurodevelopment, General Paediatrics

**Word count** – 3195 words excluding title page, abstract, references, what is known/this study adds.

### **Abstract**

**Introduction:** Immigration detention has a profound and negative impact on the physical health, mental health, development and social-emotional wellbeing of children, adolescents and their families. Australian clinicians will report results from detailed health and wellbeing assessments of asylum seeking children and adolescents who have experienced prolonged immigration detention.

**Methods and analysis:** This is a national, multicentre study with a longitudinal cohort design that will document health and wellbeing outcomes of the children and adolescents who have been detained in offshore detention on the remote island of Nauru. Outcome measures will be reported from the time arrival in Australia and repeated over a five year follow-up period. Measures include demographics, residency history and refugee status, physical health and wellbeing outcomes (including mental health, development and social-emotional wellbeing), clinical service utilisation and psychosocial risk and protective factors for health and wellbeing (e.g. adverse childhood experiences). Longitudinal follow-up will capture outcomes over a 5 year period after arrival in Australia. Analysis will be undertaken to explore baseline risk and protective factors, with regression analyses to assess their impact on health and wellbeing outcomes. To understand how children's outcomes change over time, multi-level regression analysis will be utilised. Structural equation modelling will be conducted to explore the correlation between baseline factors, mediational factors, and outcomes to assess trajectories over time.

**Ethics and dissemination.** This research project was approved by the Sydney Children's Hospitals Network Human Research Ethics Committee. Subsequent site-specific approvals have been approved in five of the eleven governing bodies where the clinical consultations took place. In order to ensure this research is relevant and sensitive to the needs of the cohort, our research team includes an asylum seeker who has spent time in Australian immigration detention. Results will be presented at conferences and published in peer-reviewed Medline-indexed journals.

1  
2  
3 **What is known about the subject**  
4

- 5  
6 1. The number of forcibly displaced people worldwide is the highest on record and over  
7 half of these are children and adolescents.  
8 2. The health and wellbeing of asylum seeking children and adolescents is a major  
9 global public health concern.  
10 3. Immigration detention is known to have a negative impact on children and  
11 adolescents' mental health, physical health, development, social and emotional  
12 wellbeing.  
13

14  
15 **What this article adds**  
16

- 17 1. This protocol describes the methods to undertake a longitudinal cohort study of  
18 children and adolescents who have been detained in immigration detention.  
19 2. We will document the immediate and long-term physical health, mental health,  
20 development and social-emotional wellbeing of children and adolescents who have  
21 experienced prolonged detention.  
22 3. Understanding the immediate and long-term impact of detention may allow us to  
23 mitigate harm by informing policy nationally and internationally.  
24  
25  
26  
27  
28  
29  
30  
31  
32  
33  
34  
35  
36  
37  
38  
39  
40  
41  
42  
43  
44  
45  
46  
47  
48  
49  
50  
51  
52  
53  
54  
55  
56  
57  
58  
59  
60

## **Introduction**

### **Background**

There are an estimated 70.9 million forcibly displaced people worldwide, the highest level on record; over half of these are children and adolescents. Around 85% of people globally are displaced internally or in neighbouring developing countries, with a small percentage reaching North America, Europe and Australasia(1). Displaced children, adolescents and adults face multiple physical and mental challenges pre-migration and in transit and continuing hardships post-migration (2-5). The United Nations High Commissioner for Refugees (UNHCR) manages programs to resettle people whose claim for refugee status has been recognized and who remain at risk, but less than 1 per cent of the world's refugees are resettled in this way. Australia formally participates in the UNHCR resettlement program accepting 12,000 – 20,000 refugees a year after their asylum claims have been processed overseas (6). Once resettled in Australia, social security payments and access to the universal healthcare system, including reduced price pharmaceutical benefits, are provided consistent with Australian citizens and other permanent residents (7).

Many wealthy reception countries now employ restrictive detention practices while protection applications are processed for people who arrive onshore and seek asylum. Since 1992 Australia has been unique in mandating indefinite incarceration of all children and adults arriving 'unauthorised' by boat. Australia has also imposed increasingly restrictive policies even for those found to be refugees. These include denial of permanent resettlement, various forms of temporary protection, and limited access to work, health care, higher education and family reunion (8, 9).

Consistent with the global trend to prevent displaced populations from making asylum claims, the Australian Government developed Regional Settlement Arrangements with the Governments of Nauru and Papua New Guinea (PNG) in 2013 (10). Under this, families and children seeking asylum were transferred to Nauru for processing and resettlement. By early 2019 all children and families held by the Australian government on Nauru since 2013 were transferred to Australia for medical care and into various forms of community detention. This very protracted offshore detention is unprecedented even by Australian standards. The extent of the negative effects on physical and mental health of the known 222 children held on Nauru during this period both in the immediate and long term is unknown. This policy is still in place leaving the status of over 600 adults unresolved as at 30 September 2019 (11).

Local and international studies confirm the profound negative impact of detention on physical health, mental health and wellbeing in children, adolescents and adults (3, 4, 7-10, 12-22). The severity of mental distress is shown to increase with the amount of time spent in detention. Common psychiatric diagnoses in children include depression, anxiety, post-traumatic stress disorder (PTSD) and somatisation in addition to described emotional, behavioural and developmental difficulties (7).

Findings in some studies are that post-migration stressors (including experiences of detention, discrimination and relocations, unsupportive social environments and parental mental illness) are more predictive of psychological problems than adverse experiences before arrival (4, 22-

1  
2  
3 28). Practices in the reception country have the potential to reduce cumulative risk and  
4 enhance protective factors to positively influence health and wellbeing outcomes. (2, 4, 23,  
5 29).  
6  
7

8 Only one study has undertaken a comparison of the mental health of resettled refugee  
9 children who were not detained with those who were held in closed detention (30). This  
10 cross-sectional study demonstrated that children with similar pre-arrival adversity and  
11 detained on Christmas Island, another processing centre for Australia, had worse social-  
12 emotional wellbeing outcomes than children not detained (30). There is a dearth of  
13 appropriately designed longitudinal studies in the literature documenting the long term  
14 impact of immigration detention in children. This is of global importance given the potential  
15 to avert the developmental and long term consequences (31).  
16  
17  
18  
19

## 20 Objectives

21 There are many practical and political challenges to working with this cohort of children, but  
22 Australia is unfortunately in a unique position to undertake a study of asylum seeking  
23 children who have been in immigration detention for prolonged periods. We aim to document  
24 the impact of detention on the health and wellbeing over time on the children and adolescents  
25 detained on Nauru. Paediatricians and child psychiatrists across Australia who specialise in  
26 refugee health are part of an organised network, known as the ‘Australian Refugee Child  
27 Health (ARCH) Network’. They provided evidence-based care to the majority of children  
28 that were detained on Nauru, including telehealth consultations prior to transfer and  
29 comprehensive medical assessments on arrival; follow up will include ongoing annual  
30 clinical reviews post-arrival. Understanding the immediate and long-term impact of detention  
31 may allow us to mitigate harm through sharing this knowledge with international colleagues  
32 and to inform policy nationally and internationally.  
33  
34  
35

## 36 Methods and analysis

### 37 38 39 **Study design**

40  
41 This is a longitudinal study of children and adolescents who were detained in Australian  
42 offshore detention. We will describe their physical health, mental health, development, social  
43 and emotional wellbeing at baseline (prior to transfer or on arrival in Australia) and over a 5  
44 year follow up period after transfer to Australia. Retrospective data will be extracted from  
45 existing medical records, and participants’ health and wellbeing will be tracked at annual  
46 consultations for 5 years post-arrival in Australia. Follow up will incorporate usual clinical  
47 assessment, an interview schedule and standardised assessments of social and emotional  
48 wellbeing.  
49  
50  
51

### 52 **Setting and study sample**

#### 53 **Participants**

54 Children and adolescents (younger than 18 years at the time of initial immigration detention)  
55 who were known to be in immigration detention or offshore processing on Nauru will be  
56 eligible for this study. The clinicians from the Australian Refugee Child Health Network have  
57 agreed to be co-investigators on this study, to identify eligible participants and to invite them  
58  
59  
60



and/or their legal parent/guardian to participate, thereby minimising the introduction of unfamiliar staff to participants.

### Study context

The Nauru Processing Centre was a locked and guarded immigration detention centre with no freedom of movement until October 2015, when it became an 'open centre', giving people limited freedom of movement. Asylum seekers were mostly accommodated in family groups although transfer to Australia for illness and other administrative reasons did result in family separation. Multiple human rights violations, limitations in agency and autonomy and continuing exposure to violence and trauma were described (8). For children this included experiences constituting neglect and maltreatment (8, 9, 13, 32). Conditions included overwhelming heat, overcrowded tents and close proximity to open-pit phosphate mining, creating recurrent asthma and irritation of the eyes and skin. Secrecy and restricted public and press access has resulted in no published evidence on the long term health of detainees in PNG and Nauru (8, 10, 32).

Publicly accessible data is mostly available for both Nauru and PNG combined. Since 2012, 4,177 people went sent to Nauru or PNG; 222 children, of whom at least 27 were unaccompanied, were sent to Nauru. The population sent to Nauru was largely composed of asylum seekers from Sri Lanka, Pakistan, Bangladesh, and people who were Stateless. Until October 2016, around 80% of detainees were found to be refugees. Four were settled in Cambodia, at least 503 were returned to their home countries, 1,117 were transferred to Australia for medical or other reasons, but not granted permanent residency, and 632 settled in the USA. The last child was transferred off Nauru in February 2019. Many children and families remained on Nauru for close to 5 years awaiting resettlement (11, 33).

### Variables

Measures that will be collected are demographics (including residency history and refugee status), physical health, clinical characteristics, and psychosocial risk and protective factors. The key outcome measure of interest is wellbeing, including mental health, development and social-emotional wellbeing. For follow up reviews, clinicians will be asked to use an interview schedule and standardised instruments for the assessment of their patient's mental health (the Child Stress Disorders Checklist for PTSD), and the Strengths and Difficulties Questionnaire (SDQ) for social-emotional wellbeing.

#### 1. Demographics

Demographic details include the child's date and place of birth, gender, ethnic background, countries of origin and transit, primary language spoken, date of arrival in Australia, family composition, parents' education, employment status and health, and financial hardship as a barrier to accessing healthcare. Residency history, including the duration and frequency of detention, and current refugee status will be collected.

#### 2. Psychosocial risk and protective factors

Known or suspected risk and protective factors will be categorised into child, family and settlement factors. This includes Refugee-specific Adverse Childhood Experiences, such as prolonged transit, interrupted education and witnessing trauma (R-ACE) (34), as well as the standard Adverse Childhood Experience (ACE) measures, such as psychological, physical



1  
2  
3 and sexual abuse and household dysfunction (substance abuse, parental mental illness,  
4 mother treated violently and criminal behaviour in the household) (31). Scoring for the ACE  
5 is based on the sum of childhood abuse and household dysfunction categories, with a score of  
6 0 indicating no exposure, and a score of 7 indicating exposure to all categories (31).  
7

### 8 9 **3. Physical health and clinical characteristics**

10  
11 Diagnoses will be coded according to the Australian Modification of the International  
12 Statistical Classification of Diseases and Related Health Problems (ICD-10-AM), an  
13 expanded version of the World Health Organization (WHO) ICD-10. Additional physical  
14 health measures include height, weight, body mass index, immunisation status, oral health,  
15 medication and other treatments. Clinical characteristics include who performed the health  
16 assessments, their frequency and location, access to healthcare and length of stay if inpatient  
17 admission was required.  
18  
19

### 20 21 **4. Outcome measure: Wellbeing**

22  
23 Wellbeing outcomes are categorised into medical and mental health diagnoses,  
24 developmental difficulties or disabilities, and social-emotional wellbeing.  
25

26  
27 As not all mental health symptoms experienced by children and adolescents reach the  
28 threshold for a DSM V diagnosis, sub-diagnostic mental health symptoms will be  
29 dichotomously coded as 'yes' or 'no'. This includes Pervasive Refusal Syndrome (PRS)  
30 symptoms (35) and Post Traumatic Stress Disorder (PTSD) symptoms (36).  
31

32  
33 Developmental difficulties or disabilities will be categorised by age (pre-school and school  
34 aged children/adolescents). Clinicians will report on developmental delay, regression,  
35 learning difficulties, Attention Deficit Hyperactivity Disorder (ADHD), Autism Spectrum  
36 Disorder (ASD) and others. If neither screening nor formal assessment was undertaken,  
37 clinicians will provide a clinical impression of their patient's neurodevelopmental status.  
38

39  
40 The SDQ will be used to measure social-emotional wellbeing and includes 25 items, with  
41 five symptom subscales assessing emotional symptoms, conduct problems, hyperactivity and  
42 inattention, peer relations, and prosocial behaviour (37, 38).  
43

### 44 **Data sources and storage**

#### 45 **Data storage**

46  
47 Data will be collected using a Research Electronic Data Capture (REDCap) survey, a secure  
48 web-based application to support research data collection (39). Critical REDCap security  
49 components involve user authentication and role-based security to ensure that all survey data  
50 entered are confidential and secured with restricted access to research personnel. Sensitive  
51 identifying information will be stored separately from any data analysis files in a secure  
52 location on UNSW OneDrive, accessible only to the study team.  
53  
54

#### 55 **Statistical methods**

56  
57  
58 Data will be analysed in a de-identified format. Data analyses will demonstrate the proportion  
59 of participants who were diagnosed with a range of medical, mental health, developmental or  
60

1  
2  
3 social-emotional wellbeing conditions at baseline and follow-up. Follow-up data will include  
4 community or held residential detention, relocated or lost to follow-up. Outcomes of interest  
5 will include social-emotional wellbeing, and mental health symptoms and disorders.  
6

7  
8 Descriptive analyses will be undertaken to summarise means, variances, and distributions of  
9 risk and protective factors at baseline and follow-up. Causal models will be developed to  
10 consider the complex relationships to physical and mental health outcomes. Structural  
11 equation modelling will be used to explore the causal relationships between predictors,  
12 mediational factors, and outcomes (e.g. mental health problems). Latent growth curve  
13 analysis will be utilised to examine the pattern of change in these outcomes over time.  
14  
15

## 16 **Patient and Public Involvement Statement**

17  
18 One of our core research study team (RR) has lived experience of detention as an asylum  
19 seeker in Australia, and in this way is similar to our patient cohort. He was involved in the  
20 study from the beginning, providing advice on key aspects of the study design, including the  
21 definition of the research questions, choice of the outcome measures and selection of relevant  
22 questions for the questionnaire. He will be involved in write-up and public dissemination of  
23 any research outputs.  
24  
25

26  
27 Although we as authors support active involvement of patients as co-producers of research,  
28 we did not involve patients in this particular study. We considered patient involvement as  
29 inappropriate given that our patients are children and adolescents who have experienced  
30 prolonged detention in Australia's offshore processing system and whose immigration status  
31 remains uncertain. This project involves the collection of their data from their treating teams  
32 and does not seek to add to their stressors by requesting anything additional from them apart  
33 from consent and attending follow up annually.  
34  
35

## 36 **Participant consent and withdrawal**

37  
38 In order to maintain participant confidentiality and privacy, eligible participants and their  
39 parent/legal guardian will be invited to participate in the study by their usual clinician. This  
40 will occur at the next scheduled consultation or, where no consultation is scheduled within  
41 two months, clinicians will telephone participants and invite them to a consultation for  
42 discussion about the study. During this consultation, clinicians will explain what participation  
43 will involve, that participation is voluntary, encourage eligible participants to ask any  
44 questions they may have and facilitate provision of consent to participate if they are  
45 interested. A qualified health care interpreter using participants' preferred language will be  
46 used to promote informed consent. Consent will be sought from both the child/adolescent  
47 participant and parent/legal guardian where the clinician deems the child/adolescent able to  
48 give informed consent, or from the parent/legal guardian only when the participant is not  
49 deemed competent and mature to give informed consent. Participants who reach the age of 18  
50 years will be able to give their own consent (40).  
51  
52

53  
54 Clinicians will present the two participation options below to children/adolescents and  
55 parents/guardians:  
56

57 **Participation Option 1. Retrospective:** Participants consent to clinicians providing data  
58 from previous clinical consultations that took place from around the time of transfer to  
59 Australia, and up to the date of consent to this study. As this participation option involves  
60 already collected data, no additional time commitments are required from participants.

## **Participation Option 2. Retrospective data collection and prospective follow-up:**

Participation will involve Option 1 (retrospective data collection) PLUS consent to clinicians providing data from clinical consultations occurring over the coming five years. If no routine consultations are clinically required, then participants will be invited to attend an annual health and wellbeing assessment that will take approximately one hour.

Where participants have relocated and are uncontactable, a waiver of consent for the clinician to provide de-identified retrospective data has been approved by the Sydney Children's Hospitals Network (SCHN) Ethics Committee in acknowledgment of the public interest imperative to understand the impact of prolonged detention on Nauru in children and adolescents.

## **Participant withdrawal and loss to follow up**

If a participant or their parent/legal guardian wishes to withdraw from the study, data will be withdrawn from the full dataset to meet the individual's wishes. All major issues arising from this study will be reported to the SCHN Ethics Committee and compiled in a final study report with reasons for the issue arising, including participant withdrawal and revocation of consent. The proportion of participant withdrawals and loss to follow-up will be recorded and reported and is of particular interest given the underlying health and wellbeing vulnerabilities of this cohort.

## **Ethics and dissemination**

Ethical approval has been granted for this research study by the SCHN Human Research Ethics Committee (HREC reference 2019/ETH11723). Together with the Site Specific Approvals (SSA), this covers eleven participating sites where eligible study children and adolescents have had or will have health assessments.

In order to ensure dissemination of this research is relevant and sensitive to the needs of this cohort, our core research team includes an asylum seeker (RR) who has spent time in Australian immigration detention.

## **Methodological considerations**

Practical and ethical obstacles to research with detained people in a politicised context include access restrictions, uncertainty of the nature of informed consent and the validity or adequacy of standardised measures within this culturally and linguistically diverse cohort. Accessing a suitable or 'generalisable' cohort is almost impossible given the changing nature of refugee populations, multiple relocations and difficulties in engaging people whose status is uncertain. In addition, obtaining informed consent remains a challenge given that some may perceive participation in research as a threat to achieving positive refugee determinations. These challenges are compounded with children.

Although many of the measurement instruments are not well validated in refugee populations, standard measures are important for gathering replicable evidence. In our study we used the measurement instruments most commonly used in the relevant literature for comparative purposes, including PTSD measures, R-ACE, ACE and the SDQ (22, 34, 41-43).

There is ongoing debate about how to quantify the impact of refugee children's exposure to different kinds of stress and trauma over the course of displacement, flight and resettlement,

1  
2  
3 particularly when arrival in a potential host country has been followed by prolonged  
4 detention. Dissecting out the impact of multiple events operating at the child, family,  
5 settlement and societal level and their relative impact on health and wellbeing is complex.  
6 This necessitates long-term follow up with collection of data on multiple risk and protective  
7 factors.  
8

9  
10 Whilst the validity of a study examining the impact of detention without a non-detained  
11 control group can be questioned, we argue that there are several recent or current Australian  
12 studies of refugee population that can be used for comparative purposes without incurring the  
13 costs of recruiting a control group. These involve children and adolescents who have not been  
14 detained and include (i) the Western Australian longitudinal study (involving 204 and 143  
15 patients aged 2-16 years) over 2014-2016 with 6 month follow-up with SDQ and R-ACE; (ii)  
16 an adolescent study from Melbourne, Australia, which assessed the predictors of self-reported  
17 health and happiness among 120 refugees over their first eight years of resettlement (2004-  
18 2013) (23, 44) and (iii) the Australian Government Building a New Life in Australia (BNLA)  
19 involving 2,399 recently-arrived refugees (including 135 adolescents aged 15-17 years) from  
20 their early months in Australia to their eligibility for citizenship (45). The latter study  
21 demonstrated that 3 years post arrival, the presence of either one or both parents with  
22 persistently high PTSD symptoms was associated with children having greater emotional  
23 difficulties and poorer overall psychosocial adjustment (using the SDQ) (45, 46). Parental  
24 wellbeing is therefore measured in our study.  
25  
26

27  
28 Cohort children are likely to have been, and continue to be, exposed to a range of  
29 interventions following arrival in Australia. We support that children access medical care,  
30 counselling and services that address the social determinants of health. In order to measure  
31 these interventions and their potential impact on health and wellbeing outcomes, we will  
32 collect detailed data on access to healthcare and interventions conducted at each study  
33 contact. Data analysis will attempt to assess the extent to which these affect health and  
34 wellbeing outcomes.  
35  
36

37  
38 To conduct the required research in an ethical manner can be prohibitively costly as face-to-  
39 face interpreters are often required, interventions for children and families with identified  
40 problems need to be provided, and tracking participants is resource intensive (5, 9, 47-49).  
41 The willingness of involved clinicians to undertake this research at each of their sites without  
42 additional resources is testament to their commitment to influencing policy change to protect  
43 the health and wellbeing of children and adolescents seeking asylum in Australia.  
44

#### 45 **Funding:**

46 This is currently an unfunded study and investigators have agreed to contribute their time in  
47 kind. We intend to apply for funding once all eleven site-specific ethical applications have  
48 been approved.  
49

#### 50 **Competing interests:** nil

#### 51 **Author contributions**

52  
53  
54  
55  
56 Study authors for this research include the core research study team, who will be responsible  
57 for collating, analysing and writing up the data, and the lead clinician at each of the 11 sites  
58 across the country. Conceptualisation of this protocol: KZ, LS, NS, NH, RR, RL (core study  
59 team)  
60

1  
2  
3 Methodology, drafting, revisions and final approval: KZ, LS, NS, NH, RL, RA, JC, SC, JF,  
4 HG, DI, DL, PL, RM, SM, CN, LN, SR, HY  
5

6  
7 **Acknowledgements**

8 We would like to acknowledge all our other colleagues who are co-investigators for this  
9 study and will be involved in the assessments and data entry: Dr Jennifer Anderson, Dr  
10 Phillip Britton, Dr Llewella Butland, Dr Gemma Hanes, Dr Jon Jureidini, Alanna Maycock,  
11 Dr Merran Mackenzie, Dr Ashfaque Quadir, Dr Veena Raghupathy, Dr Scott Sypek and  
12 Andrea Worth.  
13  
14  
15  
16  
17  
18  
19  
20  
21  
22  
23  
24  
25  
26  
27  
28  
29  
30  
31  
32  
33  
34  
35  
36  
37  
38  
39  
40  
41  
42  
43  
44  
45  
46  
47  
48  
49  
50  
51  
52  
53  
54  
55  
56  
57  
58  
59  
60

## REFERENCES

1. UNHCR. Figures at a glance. 2019 <https://www.unhcr.org/figures-at-a-glance.html> (Accessed 15 October 2019).
2. Porter M, Haslam N. Predisplacement and postdisplacement factors associated with mental health of refugees and internally displaced persons: a meta-analysis. *Journal of the American Medical Association*. 2005;294(5):602-12.
3. Lorek A, Ehntholt K, Nesbitt A, Wey E, Githinji C, Rossor E, et al. The mental and physical health difficulties of children held within a British immigration detention center: a pilot study. *Child Abuse Negl*. 2009;33(9):573-85.
4. Fazel M, Reed RV, Panter-Brick C, Stein A. Mental health of displaced and refugee children resettled in high-income countries: risk and protective factors. *The Lancet*. 2012;379(9812):266-82.
5. Reed RV, Fazel M, Jones L, Panter-Brick C, Stein A. Mental health of displaced and refugee children resettled in low-income and middle-income countries: risk and protective factors. *The Lancet*. 2012;379(9812):250-65.
6. Department of Immigration and Citizenship. Refugee and Humanitarian program. 2019 <https://immi.homeaffairs.gov.au/what-we-do/refugee-and-humanitarian-program/refugee-visas> (Accessed 10 November 2019).
7. Von Werthern M, Robjant K, Chui Z, Schon R, Ottisova L, Mason C, et al. The impact of immigration detention on mental health: a systematic review. *BMC Psychiatry*. 2018;18(1):382.
8. Australian Human Rights Commission. The Forgotten Children: National Inquiry into Children in Immigration Detention. 2014 <https://www.humanrights.gov.au/our-work/12-children-detention-nauru#a12-18> (Accessed 10 November 2019)
9. Mares S. Fifteen years of detaining children who seek asylum in Australia - evidence and consequences. *Australasian Psychiatry*. 2016;24(1):11-4.
10. Fazel M, Karunakara U, Newnham E. Detention, denial and death: migration hazards for refugee children. *Lancet Glob Health*. 2014;2(6):e313-e4.
11. Parliament of Australia. Australia's offshore processing of asylum seekers in Nauru and PNG: a quick guide to statistics and resources. 2016 [https://www.aph.gov.au/About\\_Parliament/Parliamentary\\_Departments/Parliamentary\\_Library/pubs/rp/rp1617/Quick\\_Guides/Offshore](https://www.aph.gov.au/About_Parliament/Parliamentary_Departments/Parliamentary_Library/pubs/rp/rp1617/Quick_Guides/Offshore) (Accessed 29 January 2020)
12. Zwi K, Mares S, Nathanson D, Tay AK, Silove D. The impact of detention on the social-emotional wellbeing of children seeking asylum: a comparison with community-based children. *European Child & Adolescent Psychiatry*. 2017;27(4):411-22.
13. Dudley M, Steel Z, Mares S, Newman L. Children and young people in immigration detention. *Current Opinion in Psychiatry*. 2012;25(4):285-92.
14. Robjant K, Hassan R, Katona C. Mental health implications of detaining asylum seekers: systematic review. *Br J Psychiatry*. 2009;194(4):306-12.
15. Steel Z, Momartin S, Bateman C, Hafshejani A, Silove DM, Everson N, et al. Psychiatric status of asylum seeker families held for a protracted period in a remote detention centre in Australia. *Australian & New Zealand Journal of Public Health*. 2004;28(6):527-36.
16. Ehntholt KA, Trickey D, Harris Hendriks J, Chambers H, Scott M, Yule W. Mental health of unaccompanied asylum-seeking adolescents previously held in British detention centres. *Clinical Child Psychology and Psychiatry*. 2018;23(2):238-57.
17. Reijneveld SA, de Boer JB, Bean T, Korfker DG. Unaccompanied Adolescents Seeking Asylum: Poorer Mental Health Under a Restrictive Reception. 2005;193(11):759-61.
18. Kronick R, Rousseau C, Cleveland J. Asylum-seeking children's experiences of detention in Canada: A qualitative study. *American Journal of Orthopsychiatry*. 2015;85(3):287-94.
19. Newman LK, Steel Z. The child asylum seeker: Psychological and developmental impact of immigration detention. *Child and Adolescent Psychiatric Clinics of North America*. 2008;17(3):665-83.



20. Paxton G, Tosif S, Graham H, Smith A, Reveley C, Standish J, et al. Perspective: 'The forgotten children: national inquiry into children in immigration detention (2014)'. *Journal of Paediatrics & Child Health*. 2015;51(4):365-8.
21. Young P, Gordon MS. Mental health screening in immigration detention: A fresh look at Australian government data. *Australasian Psychiatry*. 2016;24(1):19-22.
22. Hanes G, Chee J, Mutch R, Cherian S. Paediatric asylum seekers in Western Australia: Identification of adversity and complex needs through comprehensive refugee health assessment. *Journal of Paediatrics and Child Health*. 2019;0(0).
23. Correa-Velez I, Gifford SM, McMichael C. The persistence of predictors of wellbeing among refugee youth eight years after resettlement in Melbourne, Australia. *Social Science & Medicine*. 2015;142:163-8.
24. Hjern A, Angel B. Organized violence and mental health of refugee children in exile: a six-year follow-up. *Acta Paediatrica*. 2007;89(6):722-7.
25. Montgomery E. Long-term effects of organized violence on young Middle Eastern refugees' mental health. *Social Science and Medicine*. 2008;67(10):1596-603.
26. Sack W, Him C, Dickason D. Twelve-year follow-up study of Khmer youths who suffered massive war trauma as children. *Journal of the American Academy of Child & Adolescent Psychiatry*. 1999;38(9):1173-9.
27. Zwi K, Rungan S, Woolfenden S, Woodland L, Palasanthiran P, Williams K. Refugee children and their health, development and well-being over the first year of settlement: A longitudinal study. *Journal of Paediatrics and Child Health*. 2017;53(9):841-849.
28. Zwi K, Woodland L, Williams K, Palasanthiran P, Rungan S, Jaffe A, et al. Protective factors for social-emotional well-being of refugee children in the first three years of settlement in Australia. *Archives of Disease in Childhood*. 2017;103(3):261-268.
29. Zwi K, Woodland L, Mares S, Rungan S, Palasanthiran P, Williams K, et al. Helping refugee children thrive: what we know and where to next. *Archives of Disease in Childhood*. 2018;103(6):529-32.
30. Zwi K, Mares S, Nathanson D, Tay AK, Silove D. The impact of detention on the social-emotional wellbeing of children seeking asylum: a comparison with community-based children. *European child & adolescent psychiatry*. 2018;27(4):411-422.
31. Felitti VJ, Anda RF, Nordenberg D, Williamson DF, Spitz AM, Edwards V, et al. Relationship of Childhood Abuse and Household Dysfunction to Many of the Leading Causes of Death in Adults. *American Journal of Preventive Medicine*. 1998;14(4):245-258.
32. Isaacs D. Are healthcare professionals working in Australia's immigration detention centres condoning torture? 2016;42(7):413-5.
33. Refugee Council of Australia. Offshore processing statistics. 2019 <https://www.refugeecouncil.org.au/operation-sovereign-borders-offshore-detention-statistics/> (Accessed 29 January 2020)
34. Hanes G, Sung L, Mutch R, Cherian S. Adversity and resilience amongst resettling Western Australian paediatric refugees. *Journal of Paediatrics & Child Health*. 2017;53(9):882-8
35. Nunn K, Lask B, Owen I. Pervasive Refusal Syndrome 21 years on 2013. 2014;23:163-72.
36. Bosquet Enlow M, Kassam-Adams N, Saxe G. The Child Stress Disorders Checklist-Short Form: a four-item scale of traumatic stress symptoms in children. *Gen Hosp Psychiatry*. 2010;32(3):321-7.
37. Goodman R, Meltzer H, Bailey V. The Strengths and Difficulties Questionnaire: A pilot study on the validity of the self-report version. *International Review of Psychiatry*. 2003;15(1-2):173-7.
38. Goodman R. The Strengths and Difficulties Questionnaire: A Research Note. *Journal of Child Psychology and Psychiatry*. 1997;38(5):581-6.
39. Harris PA, Taylor R, Thielke R, Payne J, Gonzalez N, Conde JG. Research electronic data capture (REDCap)—A metadata-driven methodology and workflow process for providing translational research informatics support. *Journal of Biomedical Informatics*. 2009;42(2):377-81.

- 1  
2  
3 40. APREG. Clinical trials, the child participant and consent: A practical guide for investigators  
4 and sponsors. 2017  
5 [http://paediatrictrialsnetworkaustralia.com.au/images/2017\\_05\\_19\\_APREG\\_Guide\\_to\\_child\\_conse](http://paediatrictrialsnetworkaustralia.com.au/images/2017_05_19_APREG_Guide_to_child_consent_in_CT_revised_19_May_2017_FINAL_clean.pdf)  
6 [nt in CT revised 19 May 2017 FINAL clean.pdf](http://paediatrictrialsnetworkaustralia.com.au/images/2017_05_19_APREG_Guide_to_child_consent_in_CT_revised_19_May_2017_FINAL_clean.pdf) (Accessed 29 January 2020)  
7  
8 41. Gadeberg AK, Montgomery E, Frederiksen HW, Norredam M. Assessing trauma and mental  
9 health in refugee children and youth: a systematic review of validated screening and measurement  
10 tools. *European Journal of Public Health*. 2017;27(3):439-46.  
11 42. Lustig SL, Kia-Keating M, Knight WG, Geltman P, Ellis H, Kinzie J, et al. Review of child and  
12 adolescent refugee mental health. *Journal of the American Academy of Child & Adolescent*  
13 *Psychiatry*. 2004;43(1):24-36.  
14 43. Reavell J, Fazil Q. The epidemiology of PTSD and depression in refugee minors who have  
15 resettled in developed countries. *Journal of Mental Health*. 2017;26(1):74-83.  
16 44. Correa-Velez I, Gifford SM, McMichael C, Sampson R. Predictors of Secondary School  
17 Completion Among Refugee Youth 8 to 9 Years After Resettlement in Melbourne, Australia. *Journal*  
18 *of International Migration and Integration*. 2017;18(3):791-805.  
19 45. Edwards B, Smart D, De Maio J, Silbert M, Jenkinson R. Cohort Profile: Building a New Life in  
20 Australia (BNLA): the longitudinal study of humanitarian migrants. *International Journal of*  
21 *Epidemiology*. 2017;47(1):20-20h.  
22 46. Reid K, Berle D. Parental trajectories of PTSD and child adjustment: Findings from the  
23 Building a New Life in Australia study. *The American Journal of Orthopsychiatry*. 2019. DOI:  
24 10.1037/ort0000434  
25 47. Gifford S, Bakopanos C, Kaplan I, Correa-Velez I. Meaning or measurement? Researching the  
26 social contexts of health and settlement among newly-arrived refugee youth in Melbourne,  
27 Australia. *Journal of Refugee Studies*. 2007;20(3):414-40.  
28 48. Robertson J. The three Rs of action research methodology: reciprocity, reflexivity and  
29 reflection-on-reality. *Educational Action Research*. 2006;8(2):307-26.  
30 49. Warland J, Ziaian T, Stewart H, Procter N, Sawyer M, Baghurst P. Challenges faced when  
31 conducting research with young Australians with refugee experiences. *The Australian Community*  
32 *Psychologist*. 2007;19(2):53  
33  
34  
35  
36  
37  
38  
39  
40  
41  
42  
43  
44  
45  
46  
47  
48  
49  
50  
51  
52  
53  
54  
55  
56  
57  
58  
59  
60
